# Supplementary material
Source: PubMed Central journal article supplement (PMC6602123)
Supplement: Supp_Table1.pdf [file Supp_Table1.pdf]

## Supplementary Data

SUPPLEMENTARY TABLE S1. ANTIBODY INFORMATION

| <i>Antibody names</i>                       | <i>Company, Catalog No</i> | <i>Dilution</i> |
|---------------------------------------------|----------------------------|-----------------|
| Alexa Fluor 647-labeled rat antimouse CD206 | Biolegend, YB32605F        | 1:100           |
| BV421-labeled rat antimouse F4/80           | Biolegend, 123131          | 1:200           |
| Chicken anti-GFP                            | Abcam, ab13970             | 1:400           |
| FITC-labeled mouse antihuman SSEA1          | eBioscience, 11-0159-42    | 1:100           |
| FITC-labeled rat antimouse CD45             | BD Pharmingen, 553080      | 1:100           |
| Mouse anti- $\beta$ -actin                  | BOSTER, BM0627             | 1:2000          |
| Mouse anti-cTnT                             | Abcam, ab8295              | 1:400           |
| Mouse anti-DDR2                             | Abcam, ab63337             | 1:100           |
| Mouse anti-GAPDH                            | Kangchen, KC-5G5           | 1:5000          |
| Mouse anti-MESP1                            | Abcam, ab77013             | 1:100           |
| Mouse anti-NKX2.5                           | R&D, MAB2444               | 1:100           |
| PE-Cy7-labeled rat antimouse CD11b          | BD Pharmingen, 552850      | 1:100           |
| PE-labeled rat antimouse Ly-6G              | BD Pharmingen, 561104      | 1:100           |
| Rabbit anti- $\alpha$ SMA                   | Abcam, ab5694              | 1:400           |
| Rabbit anti-Akt                             | CST, 4685S                 | 1:1000          |
| Rabbit anti-caspase-3                       | CST, 9664                  | 1:1000          |
| Rabbit anti-CD206                           | Abcam, ab64693             | 1:1000          |
| Rabbit anti-CD31                            | Abcam, ab28364             | 1:100           |
| Rabbit anti-cTnI                            | Abcam, ab47003             | 1:400           |
| Rabbit anti-Erk1/2                          | CST, 4695                  | 1:1000          |
| Rabbit anti-GATA4                           | Epitomics, 5499-1          | 1:100           |
| Rabbit antihuman nucleolin                  | Abcam, ab170518            | 1:200           |
| Rabbit anti-iNOS                            | Abcam, ab129372            | 1:1000          |
| Rabbit anti-ISL1                            | Epitomics, 8403-1          | 1:200           |
| Rabbit anti-MEF2C                           | CST, 5030                  | 1:100           |
| Rabbit anti-p-Akt (S473)                    | CST, 4058S                 | 1:1000          |
| Rabbit anti-p-Erk1/2 (T202/Y204)            | CST, 4370                  | 1:1000          |
| Rabbit anti-p-STAT3 Y705                    | CST, 9145s                 | 1:1000          |
| Rabbit anti-p-STAT6 Y641                    | Abcam, ab28829             | 1:1000          |
| Rabbit anti-STAT3                           | CST, 4904P                 | 1:1000          |
| Rabbit anti-STAT6                           | Abcam, ab44718             | 1:1000          |
| Rabbit anti-Vimentin                        | CST, 5741S                 | 1:100           |
| Rat anti-CD11b                              | BD Pharmingen, 550282      | 1:200           |
| Rat anti-CD68                               | Abcam, ab53444             | 1:200           |

$\alpha$ -SMA, alpha-smooth muscle actin; Akt, protein kinase B; cTnI, cardiac troponin I; cTnT, cardiac troponin T; DDR2, discoidin domain receptor-2; EGFP, enhanced green fluorescent protein; Erk1/2, extracellular signal-regulated kinases 1/2; GAPDH, glyceraldehyde-3-phosphate dehydrogenase; GATA4, GATA binding protein 4; iNOS, inducible nitric oxide synthase; ISL1, insulin gene enhancer protein; MEF2C, myocyte enhancer factor 2c; MESP1, mesoderm posterior BHLH transcription factor 1; NKX2.5, NK2 homeobox 5; SSEA1, stage-specific embryonic antigen 1; STAT6, signal transducer and activator of transcription 6.
