# Supplementary material
Source: PubMed Central journal article supplement (PMC6602123)
Supplement: Supp_Table3.pdf [file Supp_Table3.pdf]

SUPPLEMENTARY TABLE S3. REVERSE TRANSCRIPTION-POLYMERASE CHAIN REACTION AND QUANTITATIVE REVERSE TRANSCRIPTION-POLYMERASE CHAIN REACTION PRIMERS

| <i>Targets</i> | <i>Primer sequence (5'-3')</i>                          | <i>AT (°C)</i> | <i>PS (bp)</i> |
|----------------|---------------------------------------------------------|----------------|----------------|
| hGAPDH         | F- GGAGCGAGATCCCCTCCAAAAT<br>R- GGCTGTTGTCATACTTCTCATGG | 60             | 197            |
| hIL-4          | F- CGGCAACTTTGTCCACGGA<br>R- TCTGTTACGGTCAACTCGGTG      | 60             | 111            |
| hIL-13         | F- CCTCATGGCGCTTTTGTGAC<br>R- TCTGGTTCTGGGTGATGTTGA     | 60             | 134            |
| mArg-1         | F- TGTCCCTAATGACAGCTCCTT<br>R- GCATCCACCCAAATGACACAT    | 60             | 204            |
| mCD163         | F- GGTGGACACAGAATGGTTCTTC<br>R- CCAGGAGCGTTAGTGACAGC    | 60             | 128            |
| mCD206         | F- CTCTGTTTCAGCTATTGGACGC<br>R- TGGCACTCCCAAACATAATTTGA | 60             | 190            |
| mGAPDH         | F- GTGGCAAAGTGGAGATTGTTG<br>R- CTCCTGGAAGATGGTGATGG     | 60             | 164            |
| mIL-1 $\alpha$ | F- AGTATCAGCAACGTCAAGCAA<br>R- TCCAGATCATGGGTATGGACTG   | 60             | 105            |
| mIL-1 $\beta$  | F-TGTAATGAAAGACGGCACACC<br>R- TCTTCTTTGGGTATTGCTTGG     | 60             | 111            |
| mIL-6          | F- GATGGATGCTACCAAAGTGGAT<br>R- CCAGGTAGCTATGGTACTCCAGA | 60             | 85             |
| mIL-10         | F- GCTCTTACTGACTGGCATGAG<br>R- CGCAGCTCTAGGAGCATGTG     | 60             | 105            |
| miNOS          | F- ATGTCCGAAGCAAACATCAC<br>R- TAATGTCCAGGAAGTAGGTG      | 60             | 450            |
| mTNF- $\alpha$ | F- GGGACAGTGACCTGGACTGT<br>R- CTCCCTTTGCAGAACTCAGG      | 60             | 185            |

AT, annealing temperature; F, forward; PS, product size; R, reverse.
